# Supplementary material for: Dysregulation of cholesterol homeostasis in human lung cancer tissue and tumour-associated macrophages
Source: PubMed Central journal article supplement — eBioMedicine. 2021 Sep 25;72:103578. doi: 10.1016/j.ebiom.2021.103578 (PMC8479395; doi:10.1016/j.ebiom.2021.103578), 2021-09-25
Supplement: mmc1.pdf [file mmc1.pdf]

## Supplemental Data

### Dysregulation of cholesterol homeostasis in human lung cancer tissue and tumour-associated macrophages

*Jessica Hoppstädter<sup>1</sup>, Anna Dembek<sup>1</sup>, Marcus Höring<sup>2</sup>, Hanna S. Schymik<sup>1</sup>, Charlotte Dahlem<sup>1</sup>, Afnan Sultan<sup>3</sup>, Natalie Wirth<sup>3</sup>, Salma Al-Fityan<sup>1</sup>, Britta Diesel<sup>1</sup>, Gilles Gasparoni<sup>4</sup>, Jörn Walter<sup>4</sup>, Volkhard Helms<sup>3</sup>, Hanno Huwer<sup>5</sup>, Martin Simon<sup>6</sup>, Gerhard Liebisch<sup>2</sup>, Marcel H. Schulz<sup>7</sup>, Alexandra K. Kiemer<sup>1</sup>*

<sup>1</sup> Department of Pharmacy, Pharmaceutical Biology, Saarland University, Saarbrücken, Germany

<sup>2</sup> Institute of Clinical Chemistry and Laboratory Medicine, University Hospital Regensburg, Regensburg, Germany

<sup>3</sup> Center for Bioinformatics, Saarland University, Saarbrücken, Germany

<sup>4</sup> Department of Genetics/Epigenetics, Saarland University, Saarbrücken, Germany

<sup>5</sup> Department of Cardiothoracic Surgery, Völklingen Heart Center, Völklingen, Germany

<sup>6</sup> Molecular Cell Biology and Microbiology, University of Wuppertal, Faculty of Mathematics and Natural Sciences, Wuppertal, Germany

<sup>7</sup> Institute for Cardiovascular Regeneration, Goethe University, Frankfurt am Main, Germany

Correspondence to:

Alexandra K. Kiemer, Ph.D.

Pharmaceutical Biology

Saarland University

D-66123 Saarbrücken, Germany,

Tel: +49 681 302-57301

Fax: +49 681 302-57302

pharm.bio.kiemer@mx.uni-saarland.de

## 1. Supplemental Figures

### Supplemental Figure 1

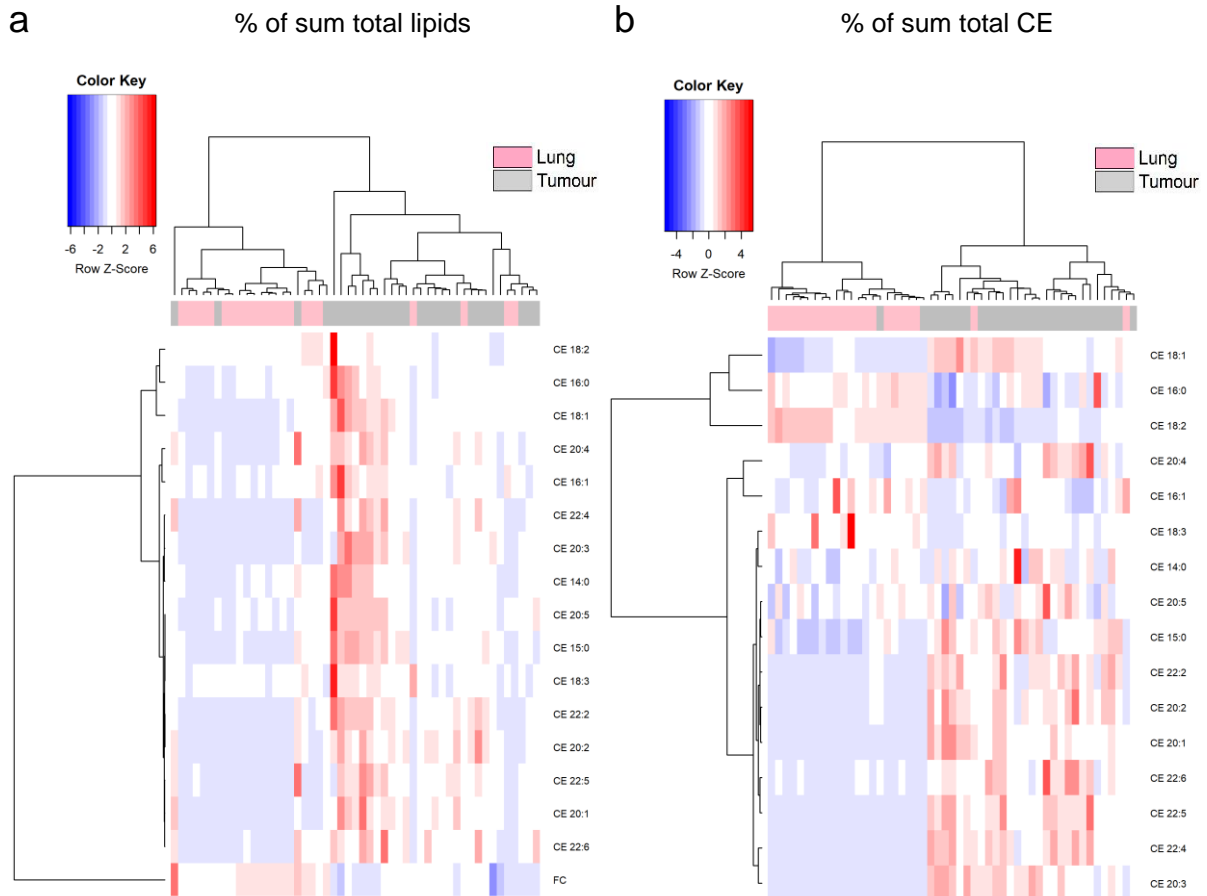

**Supplemental Figure 1:** *Sterol lipid content of human lung adenocarcinoma vs. adjacent non-tumour tissue.* Sterol lipid content of human lung adenocarcinoma vs. adjacent non-tumour tissue was determined in 22 normal and 29 tumour tissues by mass spectrometry and either expressed as percentage of total lipid concentration (a) or percentage of total cholesteryl ester concentration (b) within each tissue sample. A, B: Hierarchical clustering using Ward's linkage and Euclidean distances. Normal tissues are highlighted as grey and tumour samples as pink. FC: free cholesterol, CE: cholesteryl ester.

## Supplemental Figure 2

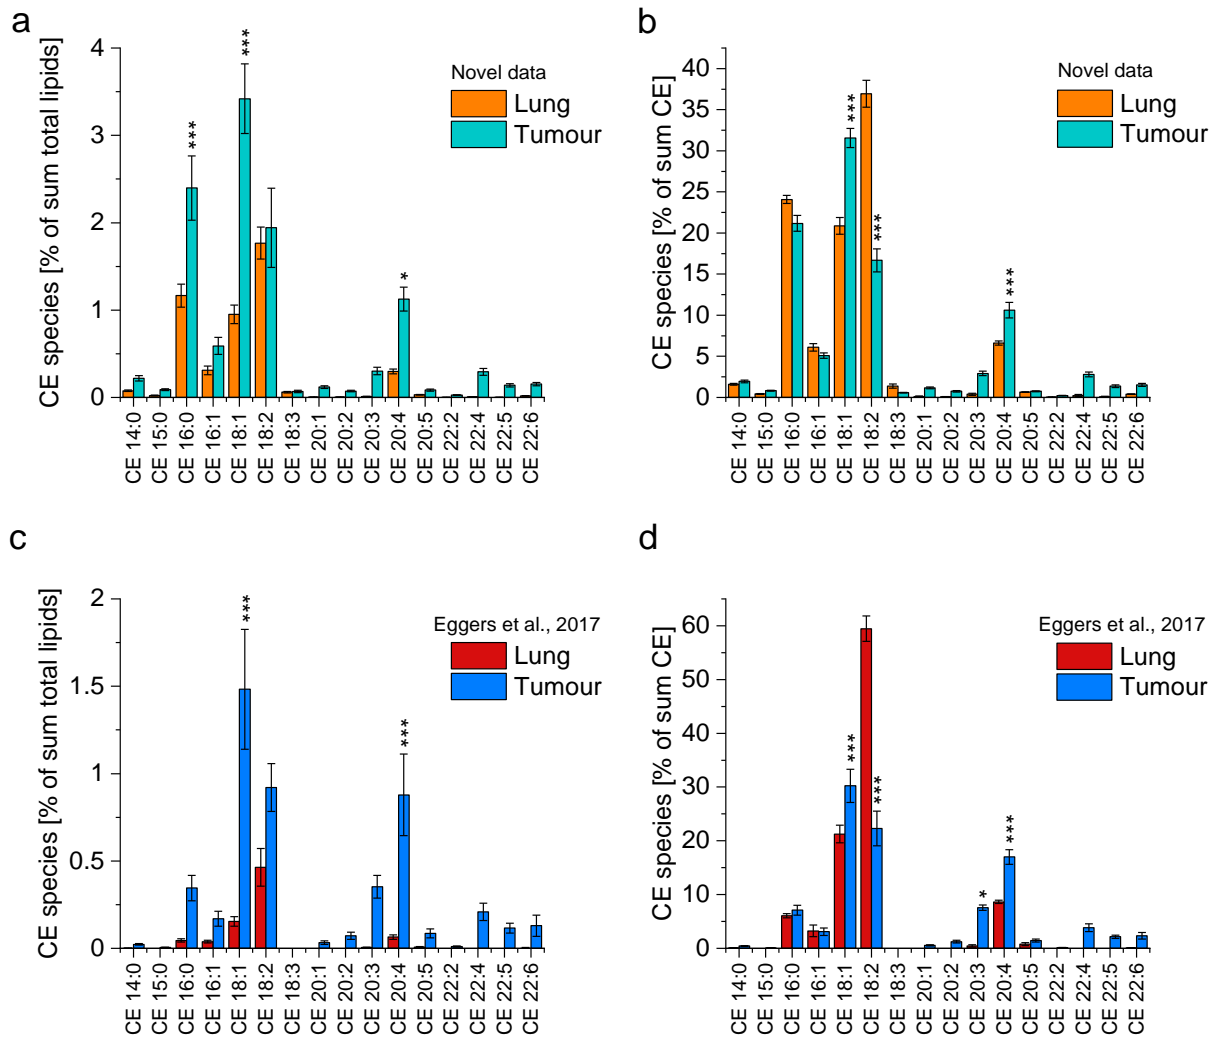

**Supplemental Figure 2.** Content of individual cholesteryl ester species in human lung adenocarcinoma vs. non-tumour tissue: comparison previously published data. The cholesteryl ester (CE) content was determined by mass spectrometry and either expressed as percentage of total lipid concentration (a, c) or percentage of total cholesteryl ester concentration (b, d) within each sample. a, b: Cholesteryl ester concentrations were determined in 22 normal and 29 tumour tissues. c, d: Cholesteryl ester concentrations in 7 normal and 10 tumour tissue samples obtained from lung adenocarcinoma patients according to a previously published data set.<sup>1</sup> \* $p < 0.05$ , \*\*\* $p < 0.001$  vs. normal lung (ANOVA with Bonferroni's post-hoc test).

### Supplemental Figure 3

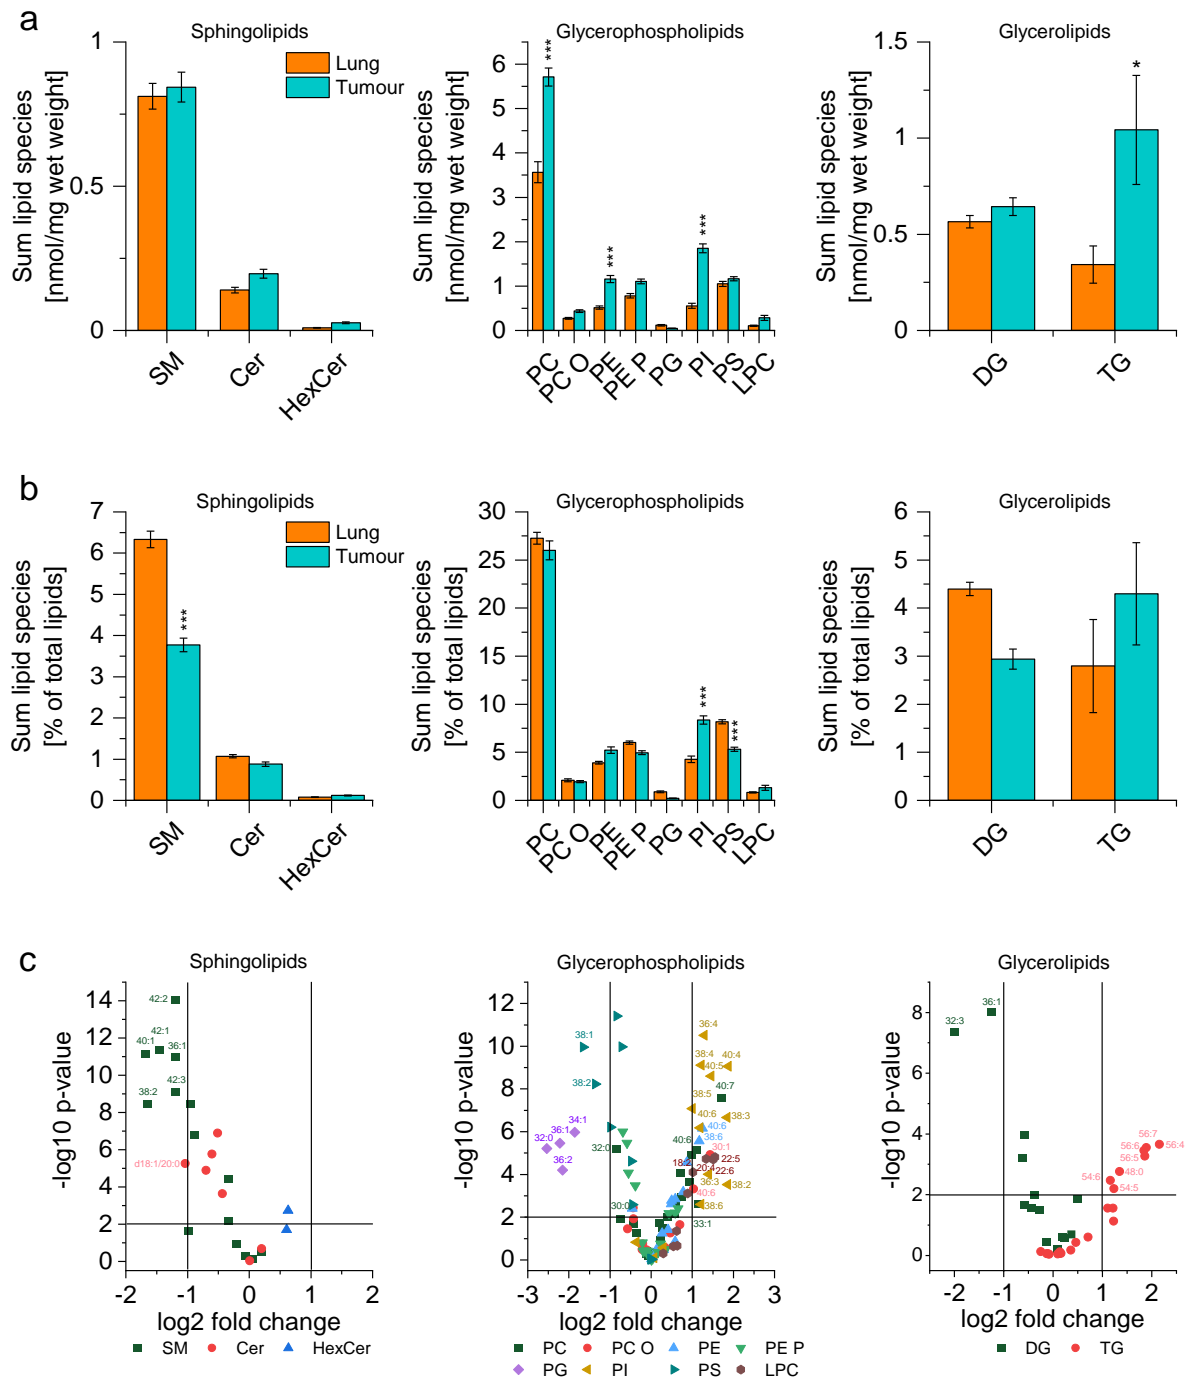

**Supplemental Figure 3: Non-sterol lipids in human lung adenocarcinoma vs. adjacent non-tumour tissue.** The lipid content of human lung adenocarcinoma vs. adjacent non-tumour tissue was determined in 22 normal and 29 tumour tissues by mass spectrometry. a: Concentration of individual lipid classes. b: Individual lipid classes were expressed as a percentage of the total lipid concentration within each tissue sample. a, b: \* $p < 0.05$ , \*\*\* $p < 0.001$  vs. normal lung (ANOVA with Bonferroni's post-hoc test). c: Fold change of individual lipid species (as % sum of total lipids) in tumour vs. normal lung tissue. Log<sub>2</sub> fold change is plotted against  $-\log_{10}$  p-value (horizontal lines:  $p = 0.01$ ; vertical lines: 2-fold change). SM: sphingomyelin; Cer: ceramide; HexCer: hexosylceramide; PC: phosphatidylcholine; PC O: PC ether; PE: phosphatidylethanolamine; PE P: PE-based plasmalogens; PG: phosphatidylglycerol; PI: phosphatidylinositol; PS: phosphatidylserine; LPC: lyso-phosphatidylcholine; DG: diacylglycerol, TG: triacylglycerol.

## Supplemental Figure 4

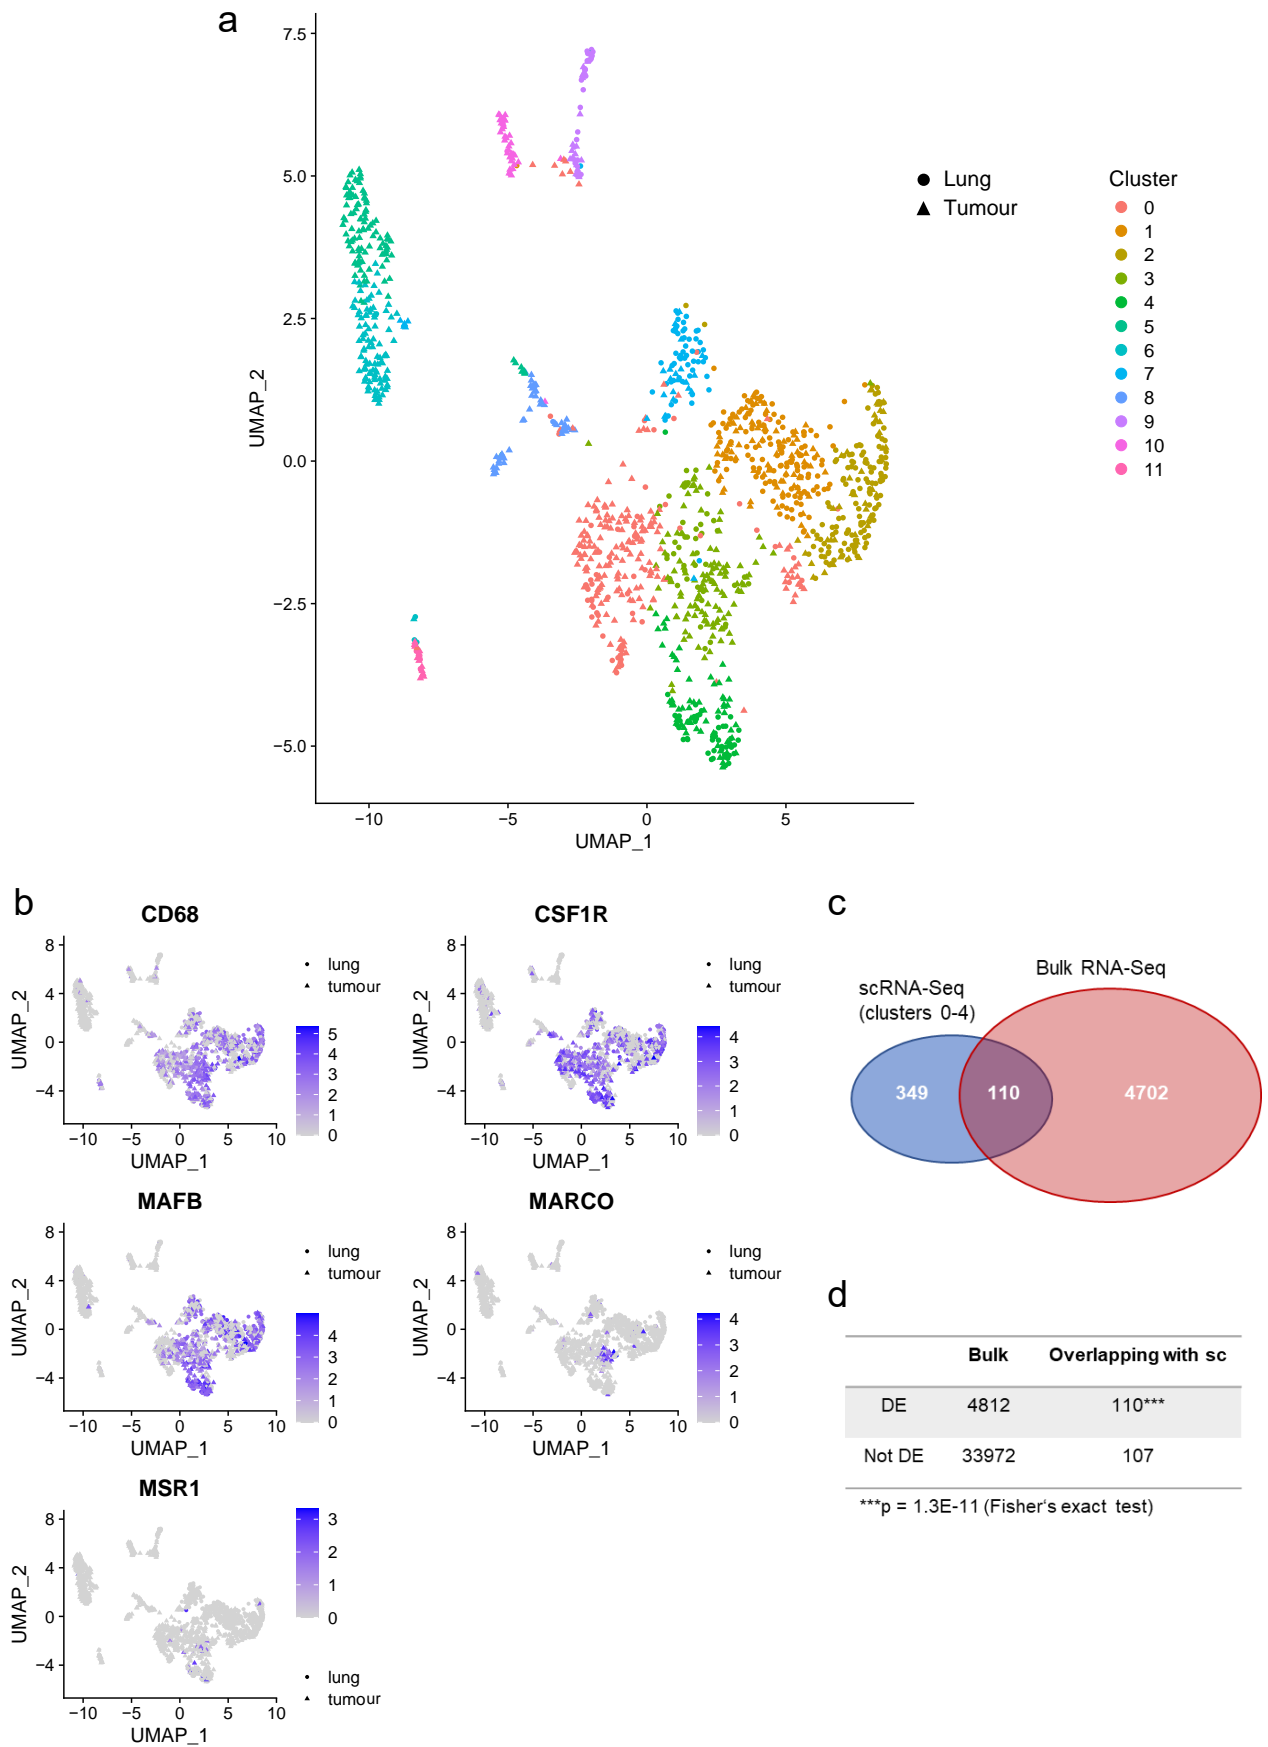

**Supplemental Figure 4:** *Comparison of bulk RNA-Seq and publicly available scRNA-Seq data.* a, b: Single cell RNA-seq (scRNA-Seq) on non-lymphocytic immune cells sorted from human early-stage lung adenocarcinoma lesions and from adjacent non-involved lung tissue (lung: n=4, tumour: n=6, GEO dataset GSE97168).<sup>2</sup> a: Clustering. b: Expression of macrophage markers *CD68*, *CSF1R*, *MAFB*, *MARCO*, and *MSR1* identified clusters 0-4 as macrophage-enriched populations. c: Overlap of genes differentially expressed between lung and tumour tissue in scRNA-Seq (clusters 0-4) and bulk RNA-Seq. d: Clear enrichment of DE genes in the comparison of bulk and single cell data. Processed sequencing data are available in the Mendeley repository (doi:10.17632/c3ntj95zgg.1).

## Supplemental Figure 5

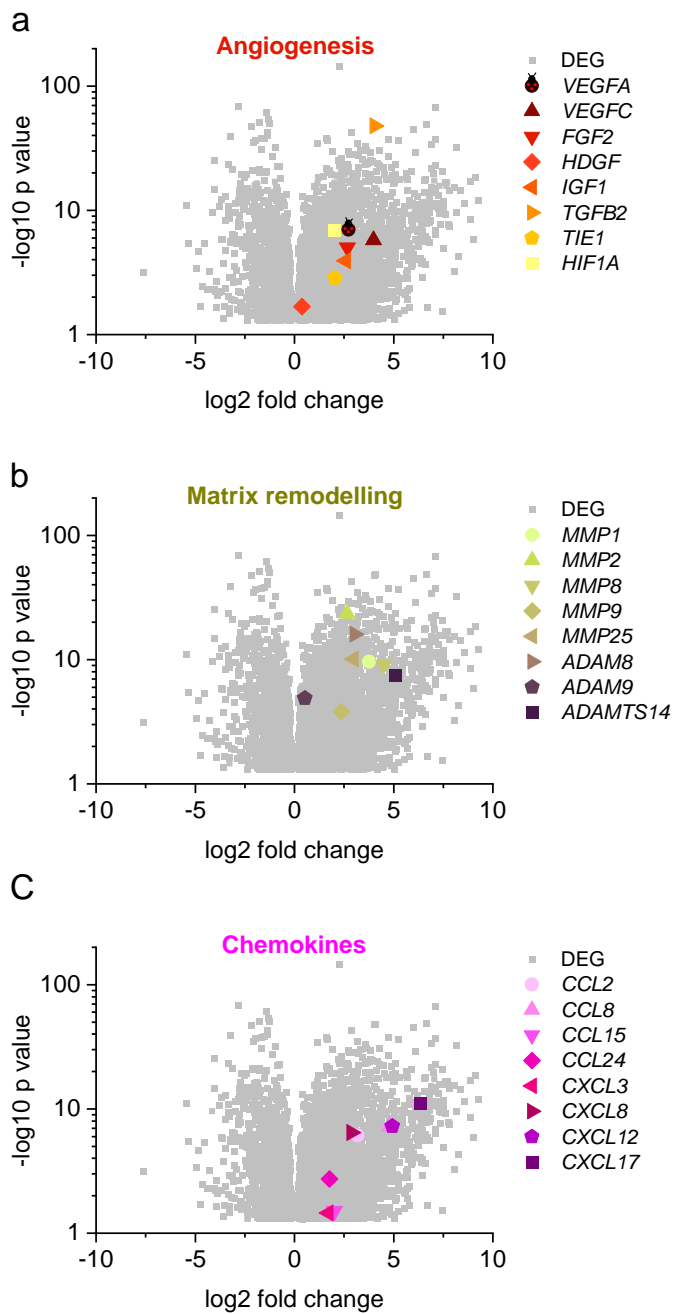

**Supplemental Figure 5: Gene expression in TAMs vs. AMs.** Differentially expressed genes (DEGs) in TAMs vs. AMs are shown as volcano plots. Log<sub>2</sub> fold change is plotted against  $-\log_{10}$  p-value. a: Angiogenesis-associated genes. *VEGFA/C*: vascular endothelial growth factor A/C; *FGF2*: fibroblast growth factor 2; *HDGF*: hepatoma-derived growth factor; *IGF1*: insulin-like growth factor 1; *TGFB2*: transforming growth factor beta 2; *TIE1*: tyrosine kinase with immunoglobulin-like and EGF-like domains 1; *HIF1A*: hypoxia-inducible factor 1-alpha. b: Genes involved in matrix remodelling. *MMP1/2/8/9/25*: matrix metalloproteinase 1/2/8/9/25; *ADAM8/9*: a disintegrin and metalloprotease 8/9; *ADAMTS14*: ADAM with thrombospondin motifs 14. c: Chemokine expression. *CCL2/8/15/24*: CC chemokine ligand 2/8/15/24; *CXCL3/8/12/17*: C-X-C motif ligand 3/8/12/17.

## Supplemental Figure 6

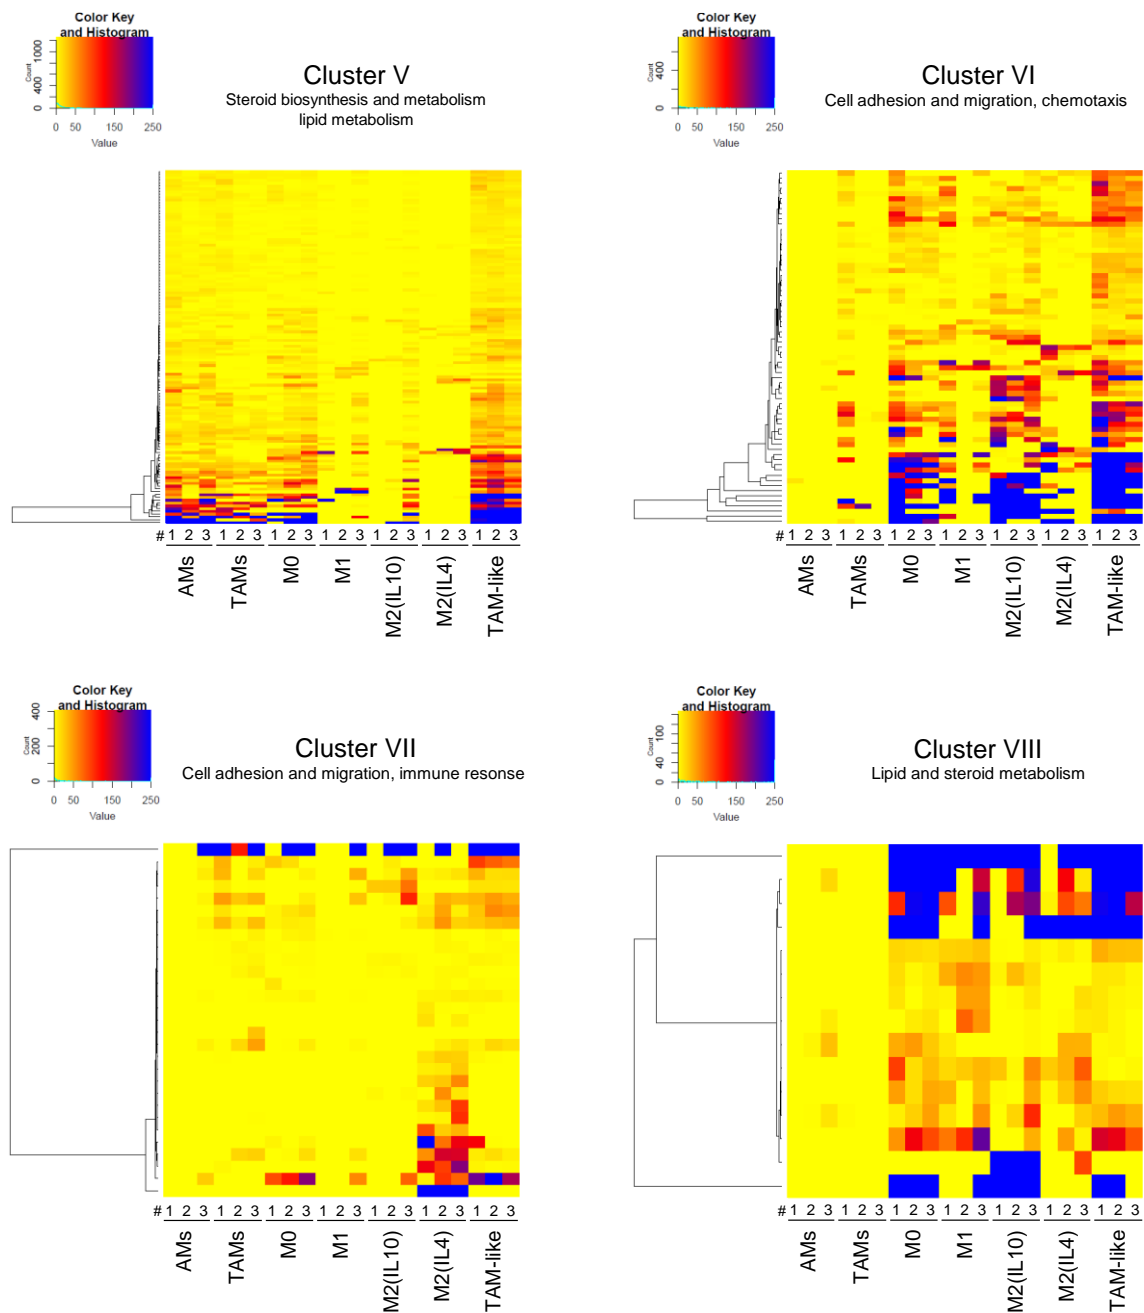

**Supplemental Figure 6:** Comparison of gene expression signatures of TAMs/AMs and *in vitro* polarized macrophages, clusters V-VIII. Genes differentially expressed in TAMs vs. AMs were clustered according to their expression pattern, and gene expression in *in vitro* polarized cells and *ex vivo* macrophages is visualized as one heatmap per cluster. Clusters were linked to distinct functions based on the predominant GO terms associated with genes contained within each cluster. TAMs/AMs: mean values of technical replicates for each donor are shown. MDMs: Individual values per donor are shown.



## Supplemental Figure 7

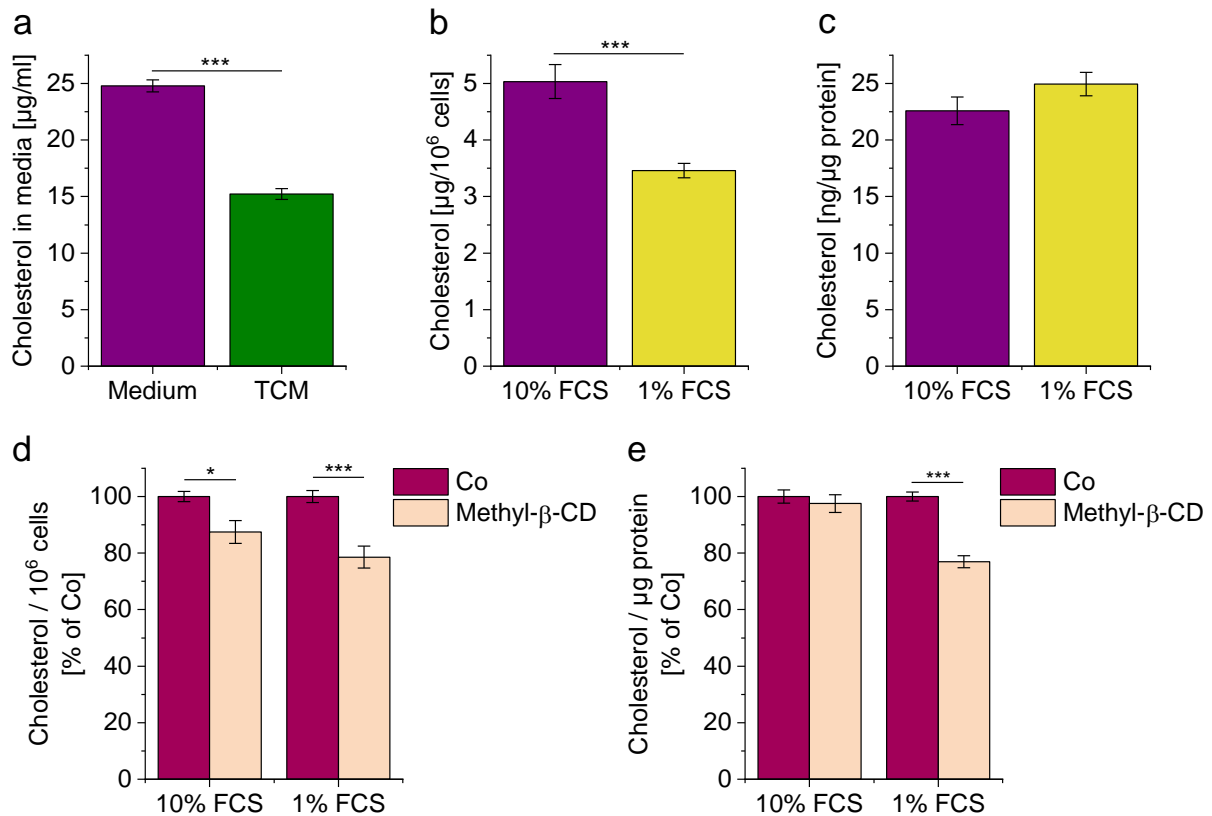

**Supplemental figure 7: Cholesterol content in media and macrophages.** a: Cholesterol concentration in standard macrophage medium containing 10% FCS and A549 tumour cell-conditioned medium (TCM) (n=11, each). b, c: Cellular cholesterol content of human MDMs cultured in medium containing 10% FCS (normal medium) or 1% FCS (starving medium) for 24 hours. Values were normalized to cell count (b) or total cellular protein (c) (n=5, triplicates). d, e: MDMs were incubated with PBS (Co) or Methyl- $\beta$ -cyclodextrin (Methyl- $\beta$ -CD, 5 mM in PBS) for one hour, followed by incubation in media containing either 10% or 1% FCS for 24 hours. Cholesterol concentrations were measured in MDM lysates, either normalized to cell count (d) or protein content (e) and are expressed as percentage of the respective control (n=4, triplicates). \*p<0.05, \*\*\*p<0.001 (a-c: t-test, d-e: ANOVA with Bonferroni's post-hoc test).

## Supplemental Figure 8

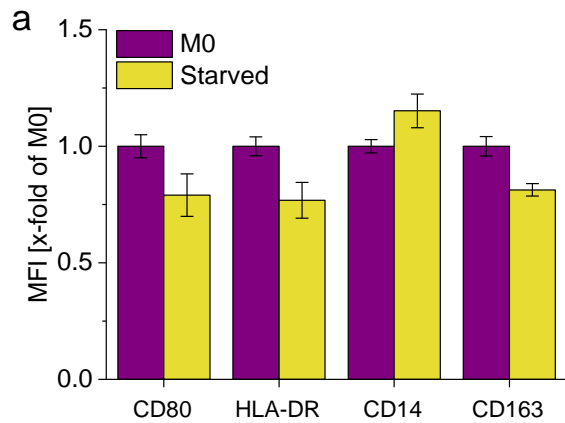

**Supplemental Figure 8: Surface marker expression upon starving and cholesterol depletion.** Surface marker expression was quantified by flow cytometry. a: Human MDMs were cultured in medium containing 10% FCS (normal medium, M0) or 1% FCS (starving medium) for 24 hours. Mean fluorescence intensities (MFIs) are expressed as x-fold of M0 cells (n=4, duplicates). b: MDMs were incubated with PBS (Co) or Methyl- $\beta$ -cyclodextrin (Methyl- $\beta$ -CD, 5 mM in PBS) for one hour, followed by incubation in media containing 1% FCS for 24 hours. MFIs are expressed as x-fold of Co (n=3, duplicates). \*\*\*p<0.001 (ANOVA with Bonferroni's post-hoc test).

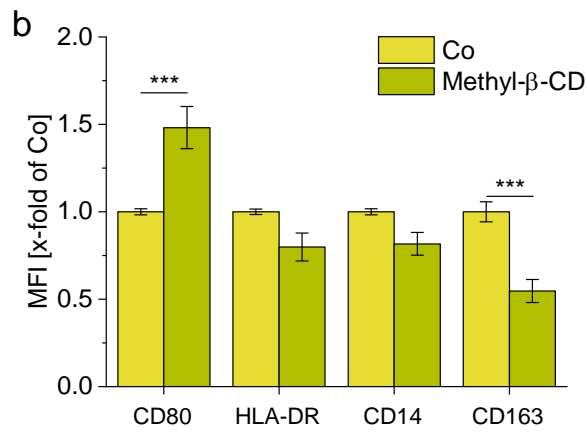

## 2. Supplemental Tables

**Supplemental Table 1: Patient data.**

| Gender | Age (years) | TNM (8 <sup>th</sup> ed.) | Tissue |        | Used for               |                            |                                |
|--------|-------------|---------------------------|--------|--------|------------------------|----------------------------|--------------------------------|
|        |             |                           | Lung   | Tumour | Lipidomics (Donor No.) | TAM/AM RNA-Seq (Donor No.) | TAM/AM Cholesterol (Donor No.) |
| female | 57          | T2aN0                     | x      | x      | 1                      |                            |                                |
| male   | 54          | T2bN1                     | x      | x      | 2                      |                            |                                |
| male   | 64          | T2aN1                     | x      | x      | 3                      |                            |                                |
| female | 85          | T3N0                      | x      | x      | 4                      |                            |                                |
| female | 71          | T3N0                      | x      | x      | 5                      |                            |                                |
| female | 74          | T3N0                      | x      | x      | 6                      |                            |                                |
| female | 74          | T2aN0                     | x      | x      | 7                      |                            |                                |
| male   | 66          | T4N1                      | x      | x      | 8                      |                            |                                |
| male   | 73          | T1aN0                     | x      | x      | 9                      |                            |                                |
| female | 65          | T2aN2                     | x      | x      | 10                     |                            |                                |
| male   | 69          | T3N1                      | x      | x      | 11                     |                            |                                |
| male   | 70          | T2aN1                     | x      | x      | 12                     |                            |                                |
| male   | 73          | T3N1                      | x      | x      | 13                     |                            |                                |
| male   | 64          | T2aN2                     | x      | x      | 14                     |                            |                                |
| female | 75          | T1aN0                     | x      | x      | 15                     |                            |                                |
| female | 53          | T2bN2                     | x      | x      | 16                     |                            |                                |
| female | 76          | T2aN0                     | x      | x      | 17                     |                            |                                |
| female | 42          | T3N0                      | x      | x      | 18                     |                            |                                |
| male   | 68          | T2bN0                     | x      | x      | 19                     |                            |                                |
| male   | 63          | T3N2                      | x      | x      | 20                     |                            |                                |
| male   | 46          | T3N2                      | x      | x      | 21                     |                            |                                |
| male   | 71          | T2aN0                     | x      | x      | 22                     |                            |                                |
| female | 66          | T4N2                      | -      | x      | 23                     |                            |                                |
| male   | 70          | T2aN0                     | -      | x      | 24                     |                            |                                |
| female | 61          | T2aN0                     | -      | x      | 25                     |                            |                                |
| male   | 73          | T4N0                      | -      | x      | 26                     |                            |                                |
| female | 62          | T1bN0                     | -      | x      | 27                     |                            |                                |
| female | 77          | T3N0                      | -      | x      | 28                     |                            |                                |
| male   | 78          | T2bN1                     | -      | x      | 29                     |                            |                                |
| male   | 70          | T2aN1                     | x      | x      |                        | 1                          |                                |
| female | 74          | T1aN0                     | x      | x      |                        | 2                          |                                |
| female | 75          | T2aN0                     | x      | x      |                        | 3                          |                                |
| male   | 53          | T2aN0                     | x      | x      |                        |                            | 1                              |
| male   | 68          | T2aN1                     | x      | x      |                        |                            | 2                              |
| female | 76          | T2aN0                     | x      | x      |                        |                            | 3                              |
| male   | 75          | T2aN0                     | x      | x      |                        |                            | 4                              |

**Supplemental Table 2: Primer sequences.**

| <b>Gene</b>  | <b>Forward</b>              | <b>Reverse</b>             |
|--------------|-----------------------------|----------------------------|
| <i>ABCA1</i> | CATCTGGTTCTATGCCCGCT        | TCTGCATTCCACCTGACAGC       |
| <i>ABCG1</i> | GCGCCAAACTCTTCGAGCTG        | CGGATGCAACCTCCATGACAAA     |
| <i>ACTB</i>  | TGCGTGACATTAAGGAGAAG        | GTCAGGCAGCTCGTAGCTCT       |
| <i>CCL2</i>  | TTGATGTTTTAAGTTTATCTTTCATGG | CAGGGGTAGAACTGTGGTTCA      |
| <i>CXCL8</i> | GAGAAGTTTTGAAGAGGGCTGA      | GCTTGAAGTTTCACTGGCATCT     |
| <i>HIF1A</i> | CGGGGACCGATTCACCAT          | TTTCGAACGTTCAGAACTTATCTTTT |
| <i>HMGCR</i> | GCAGGACCCCTTTGCTTAGA        | GCACCTCCACCAAGACCTAT       |
| <i>MMP2</i>  | CGTCGCCCATCATCAAGTTC        | GAAGGTGTTTCAAGTATTGCACTG   |
| <i>MMP9</i>  | CTTTGAGTCCGGTGGACGAT        | TCGCCAGTACTTCCCATCCT       |
| <i>MVK</i>   | GGAGCCATGTTGTCAGAAGTC       | TACAGCCAGTGCTACCTTGC       |
| <i>VEGFA</i> | CGCTTACTCTCACCTGCTTCTG      | GGTCAACCACTCACACACACAC     |

**Supplemental Table 3: Sample sizes and statistical tests.**

| Title                                                                                 | Sample size                       | Data reported as                                           | Unit                          | Statistical test                               | Figure |
|---------------------------------------------------------------------------------------|-----------------------------------|------------------------------------------------------------|-------------------------------|------------------------------------------------|--------|
| Total lipids in lung and tumour tissues                                               | lung = 22, tumour = 29            | Mean $\pm$ SD                                              | nmol/mg wet weight            | t-test                                         | 1b     |
| Sterol lipids in lung and tumour tissue                                               | lung = 22, tumour = 29            | Mean $\pm$ SEM                                             | nmol/mg wet weight            | ANOVA with Bonferroni's post-hoc test          | 1c     |
| Sterol lipids in lung and tumour tissue                                               | lung = 22, tumour = 29            | Mean $\pm$ SEM                                             | % of total lipids             | ANOVA with Bonferroni's post-hoc test          | 1e     |
| CE species in lung and tumour tissue                                                  | lung = 22, tumour = 29            | Mean $\pm$ SEM                                             | nmol/mg wet weight            | ANOVA with Bonferroni's post-hoc test          | 1f     |
| Intracellular cholesterol in AMs and TAMs                                             | n = 4 (duplicates or triplicates) | Mean $\pm$ SEM                                             | $\mu$ g/10 <sup>6</sup> cells | t-test                                         | 2a     |
| Intracellular cholesterol in AMs and TAMs                                             | n = 4 (duplicates or triplicates) | Mean $\pm$ SEM                                             | ng/ $\mu$ g protein           | t-test                                         | 2b     |
| Enriched GO terms                                                                     | n = 3 (triplicates)               | N/A                                                        | N/A                           | Mann-Whitney U test with Bonferroni correction | 2c, 2g |
| DEGs in TAMs vs. AMs (RNA-Seq)                                                        | n = 3 (triplicates)               | log <sub>2</sub> fold change vs. Log <sub>10</sub> p-value | N/A                           | Wald-test with Bonferroni correction           | 2f, 2i |
| Surface marker expression in <i>in vitro</i> polarized macrophages                    | n = 4-7 (duplicates)              | Mean $\pm$ SEM                                             | x-fold of M0                  | ANOVA with Bonferroni's post-hoc test          | 3b     |
| DEGs in <i>in vitro</i> polarized macrophages (RNA-Seq)                               | n = 3                             | No. of DEGs                                                | N/A                           | Mann-Whitney U test with Bonferroni correction | 3c     |
| Comparison of DEGs in TAMs vs. AMs to <i>in vitro</i> polarized macrophages (RNA-Seq) | n = 3                             | N/A                                                        | TPM                           | Mann-Whitney U test with Bonferroni correction | 4      |
| Enriched GO terms (overlapping DEGs between TAMs vs. AMs and TAM-like vs. M0)         | n = 3                             | N/A                                                        | N/A                           | Mann-Whitney U test with Bonferroni correction | 5a, 5b |
| DEGs in TAM-like vs. M0 cells (RNA-Seq)                                               | n = 3                             | log <sub>2</sub> fold change vs. Log <sub>10</sub> p-value | N/A                           | Wald-test with Bonferroni correction           | 5e     |
| Intracellular cholesterol in <i>in vitro</i> polarized macrophages                    | n = 3 (triplicates)               | Mean $\pm$ SEM                                             | $\mu$ g/10 <sup>6</sup> cells | ANOVA with Bonferroni's post-hoc test          | 5f     |
| Gene expression in M0, TAM-like and starved macrophages (qPCR)                        | n = 4 (triplicates)               | Mean $\pm$ SEM                                             | x-fold of M0                  | ANOVA with Bonferroni's post-hoc test          | 6a     |
| Intracellular cholesterol upon cholesterol depletion                                  | n = 4 (triplicates)               | Mean $\pm$ SEM                                             | ng/ $\mu$ g protein           | t-test                                         | 6b     |
| Gene expression in cholesterol-depleted macrophages                                   | n = 3 (triplicates)               | Mean $\pm$ SEM                                             | x-fold of Co                  | ANOVA with Bonferroni's post-hoc test          | 6c     |
| Intracellular cholesterol in ATR-101-treated macrophages                              | n = 4 (triplicates)               | Mean $\pm$ SEM                                             | ng/ $\mu$ g protein           | ANOVA with Bonferroni's post-hoc test          | 6d     |
| Gene expression in ATR-101-treated macrophages                                        | n = 3 (duplicates)                | Mean $\pm$ SEM                                             | % of TAM-like                 | ANOVA with Bonferroni's post-hoc test          | 6e     |
| CE species in lung and tumour tissue (% of sum total)                                 | lung = 22, tumour = 29            | Mean $\pm$ SEM                                             | % of total lipids             | ANOVA with Bonferroni's post-hoc test          | S2a    |
| CE species in lung and tumour tissue (% of sum CE)                                    | lung = 22, tumour = 29            | Mean $\pm$ SEM                                             | % of sum CE                   | ANOVA with Bonferroni's post-hoc test          | S2b    |
| CE species in lung and tumour tissue (% of sum total)                                 | lung = 7, tumour = 10             | Mean $\pm$ SEM                                             | % of total lipids             | ANOVA with Bonferroni's post-hoc test          | S2c    |

|                                                                             |                                                         |                                    |                          |                                                |     |
|-----------------------------------------------------------------------------|---------------------------------------------------------|------------------------------------|--------------------------|------------------------------------------------|-----|
| CE species in lung and tumour tissue (% of sum CE)                          | lung = 7, tumour = 10                                   | Mean ± SEM                         | % of sum CE              | ANOVA with Bonferroni's post-hoc test          | S2d |
| Non-sterol lipids: concentration                                            | lung = 22, tumour = 29                                  | Mean ± SEM                         | nmol/mg wet weight       | ANOVA with Bonferroni's post-hoc test          | S3a |
| Non-sterol lipids: % of total lipids                                        | lung = 22, tumour = 29                                  | Mean ± SEM                         | % of total lipids        | ANOVA with Bonferroni's post-hoc test          | S3b |
| Non-sterol lipids: individual lipid species                                 | lung = 22, tumour = 29                                  | log2 fold change vs. Log10 p-value | nmol/mg wet weight       | Mann-Whitney U test with Bonferroni correction | S3c |
| DEGs in TAMs vs. AMs (bulk RNA-Seq vs. scRNA-Seq)                           | bulk: n = 3 (triplicates),<br>sc: normal =4, tumour = 6 | No. of DEGs                        | N/A                      | Wald-test with Bonferroni correction           | S4c |
| DEGs in TAMs vs. AMs (bulk RNA-Seq vs. scRNA-Seq): gene enrichment          | bulk: n = 3 (triplicates),<br>sc: normal =4, tumour = 6 | No. of overlapping genes           | N/A                      | Fisher's Exact test                            | S4d |
| DEGs in TAMs vs. AMs (RNA-Seq)                                              | n = 3 (triplicates)                                     | log2 fold change vs. Log10 p-value | N/A                      | Wald-test with Bonferroni correction           | S5  |
| Comparison of DEGs in TAMs vs. AMs to vitro polarized macrophages (RNA-Seq) | n = 3                                                   | N/A                                | TPM                      | Mann-Whitney U test with Bonferroni correction | S6  |
| Cholesterol in media                                                        | n = 11                                                  | Mean ± SEM                         | µg/ml                    | t-test                                         | S7a |
| Cholesterol in starved macrophages                                          | n = 5 (triplicates)                                     | Mean ± SEM                         | µg/10 <sup>6</sup> cells | t-test                                         | S7b |
| Cholesterol in starved macrophages                                          | n = 5 (triplicates)                                     | Mean ± SEM                         | ng/µg protein            | t-test                                         | S7c |
| Cholesterol in cholesterol-depleted macrophages kept in different media     | n = 4 (triplicates)                                     | Mean ± SEM                         | µg/10 <sup>6</sup> cells | ANOVA with Bonferroni's post-hoc test          | S7d |
| Cholesterol in cholesterol-depleted macrophages kept in different media     | n = 4 (triplicates)                                     | Mean ± SEM                         | ng/µg protein            | ANOVA with Bonferroni's post-hoc test          | S7e |
| Surface marker expression upon starving                                     | n = 4 (duplicates)                                      | Mean ± SEM                         | x-fold of M0             | ANOVA with Bonferroni's post-hoc test          | S8a |
| Surface marker expression upon cholesterol depletion                        | n = 3 (duplicates)                                      | Mean ± SEM                         | x-fold of Co             | ANOVA with Bonferroni's post-hoc test          | S8b |

### 3. References

1. Eggers LF, Müller J, Marella C, Scholz V, Watz H, Kugler C, Rabe KF, Goldmann T, Schwudke D. Lipidomes of lung cancer and tumour-free lung tissues reveal distinct molecular signatures for cancer differentiation, age, inflammation, and pulmonary emphysema. *Sci Rep.* 2017;7(1):11087.
2. Lavin Y, Kobayashi S, Leader A, Amir ED, Elefant N, Bigenwald C, Remark R, Sweeney R, Becker CD, Levine JH, Meinhof K, Chow A, Kim-Shulze S, Wolf A, Medaglia C, Li H, Rytlewski JA, Emerson RO, Solovyov A, Greenbaum BD, Sanders C, Vignali M, Beasley MB, Flores R, Gnjjatic S, Pe'er D, Rahman A, Amit I, Merad M. Innate immune landscape in early lung adenocarcinoma by paired single-cell analyses. *Cell.* 2017;169(4):750-765 e717.
